# Supplementary material for: An Asia-specific variant of human IgG1 represses colorectal tumorigenesis by shaping the tumor microenvironment
Source: PubMed Central journal article supplement (PMC8920342; doi:10.1172/jci153454), 2022-03-15
Supplement: jci-132-153454-s129.pdf [file jci-132-153454-s129.pdf]

## Supplemental figures

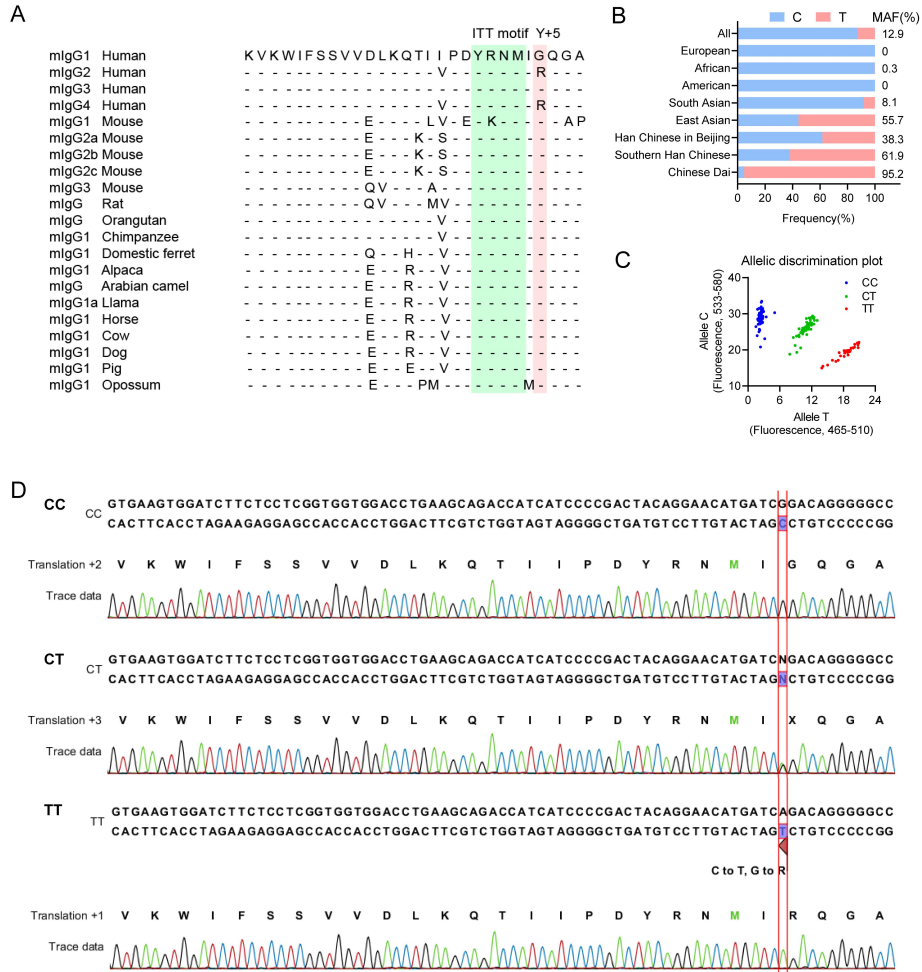

**Supplemental Figure 1. The conserved cytoplasmic tail sequence of mIgG and the identification of the hIgG1-G396R variant.**

(A) Amino acid sequences of the conserved tail of membrane-bound IgG in different species. (B) Global minor allele frequency (MAF) among populations in different regions are shown. (C) The distribution of three genotypes, including hIgG1-G396R homozygotes, heterozygotes and WT, detected by TaqMan-probe based genotyping. (D) The aligned target sequences of WT, hIgG1-G396R heterozygote and homozygote. The C/T polymorphism are highlighted.

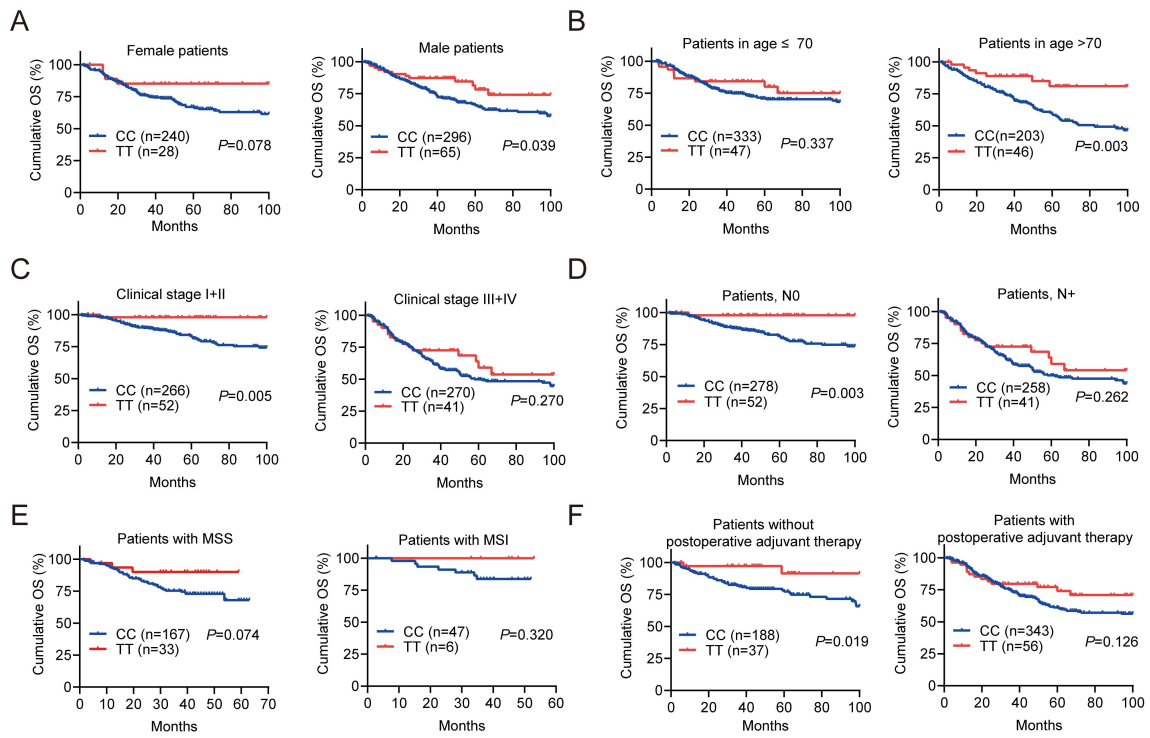

**Supplemental Figure 2. hIgG1-G396R variant is consistently associated with prolonged OS.**

(A-F) OS curves of 1006 CRC patients with different clinical treatments and clinical manifestations. Statistical significance was determined using a Log-rank test (A-F).

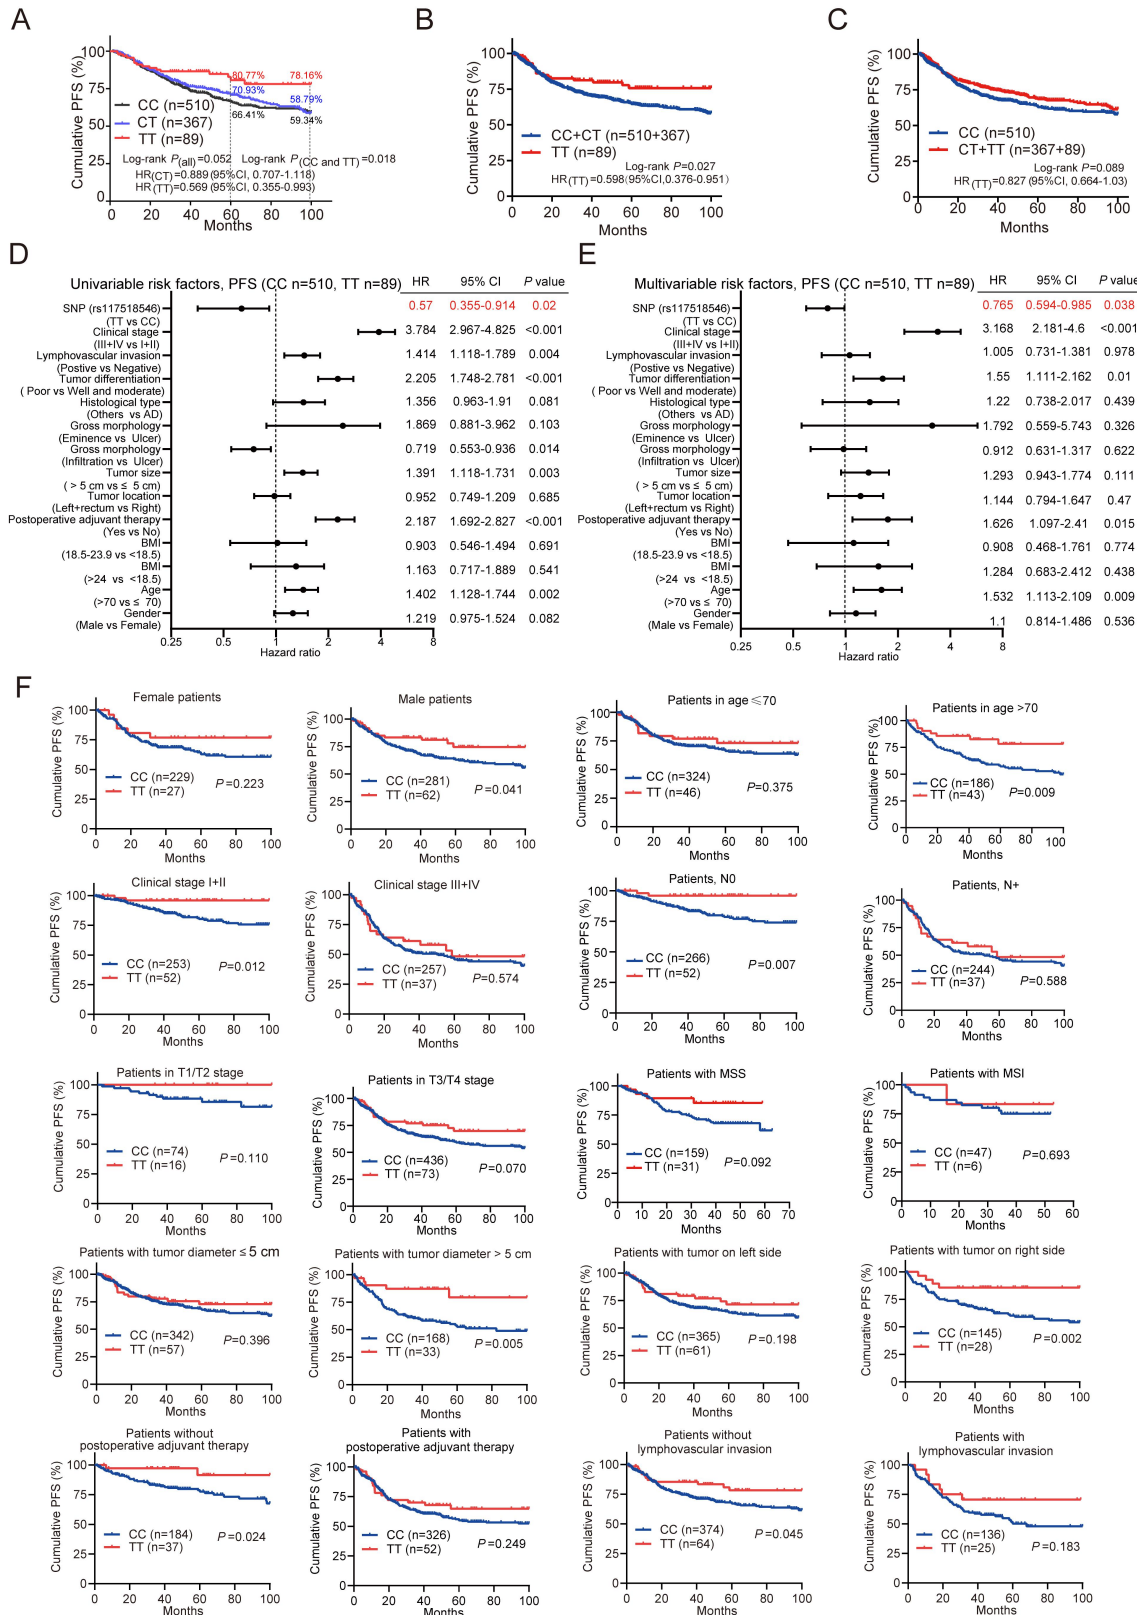

**Supplemental Figure 3. hIgG1-G396R variant is associated with superior PFS and is an independent favorable prognosis marker for PFS.**

(A) Survival curves of 966 CRC patients with available follow-up information of PFS were analyzed for the association of hIgG1-G396R with PFS. (B-C) Survival curves of 966 CRC patients grouped by recessive model (B) and dominant model (C). (D) Univariable and (E) multivariable COX regression analysis of PFS of 966 CRC patients and risk factors. (F) PFS curves of CRC patients with different treatments and clinical manifestations. Statistical significance was determined using a Log-rank test.

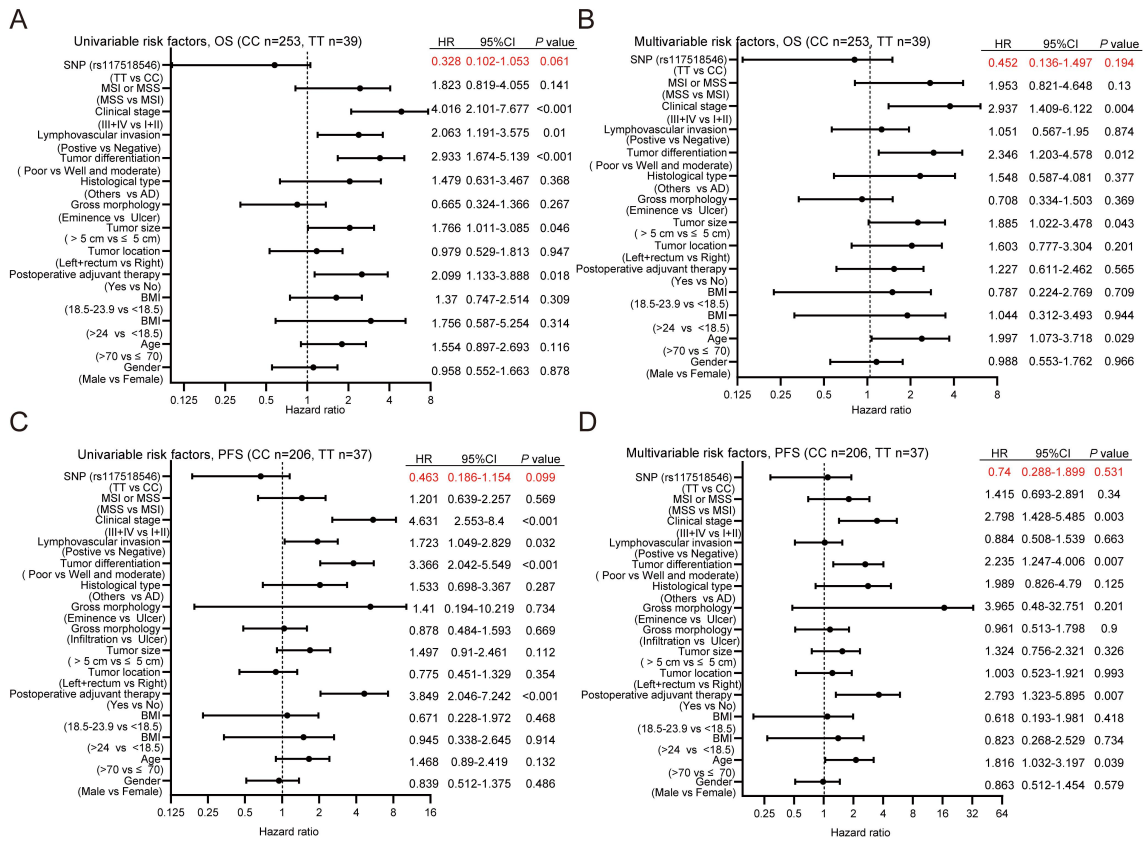

**Supplemental Figure 4. Multivariable regression analyses of CRC patients with MSS/MSI information.**

(A-B) Forest plot based on the results of (A) univariable risk analysis and (B) multivariable risk analysis of the risk factors associated with OS of CRC patients (n=292), which have MSI/MSS information records. (C-D) Forest plot based on the results of (C) univariable risk analysis and (D) multivariable risk analysis of the risk factors associated with PFS of CRC patients (n=243), which have available MSI/MSS information records and PFS records. HR, hazard ratio.

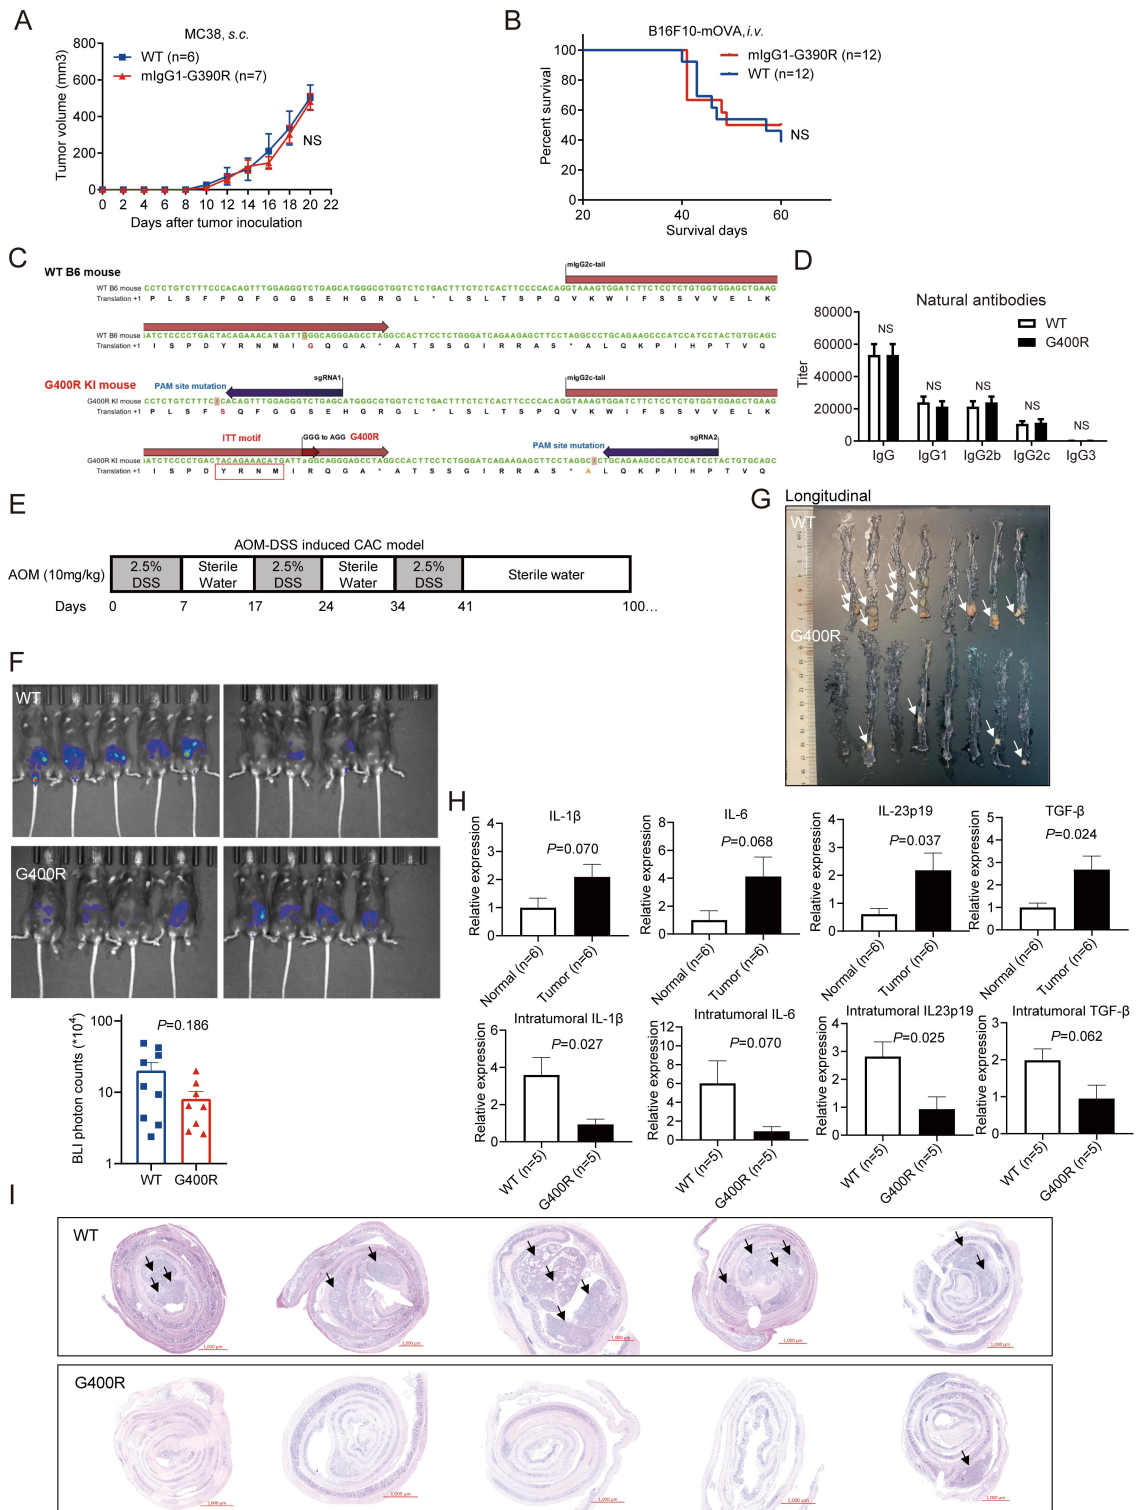

**Supplemental Figure 5. The mIgG2c-G400R knock-in mice, manipulating by CRISPR-Cas9 system, exhibit significantly ameliorated colon tumorigenesis.**

(A) Tumor growth of MC38 cells in WT (n=6) and mIgG1-G390R (n=7) mice. (B) Survival curves of OVA-immunized WT (n=12) and mIgG1-G390R (n=12) mice after

intravenous injection of B16F10-mOVA tumor cells. (C) Alignment of the *IGHG2C* DNA sequence from NCBI database with the sequencing data of the mIgG2c-G400R knock-in mouse. Annotated are the sgRNA target sequences, mIgG2c-tail and mIgG2c-G400R variant site. (D) Basal levels of natural IgG, IgG1, IgG2b, IgG2c and IgG3 antibodies in the serum samples of untreated 6-week-old WT (n=6) and mIgG2c-G400R (n=6) mice. Statistical significance was determined using an unpaired two-tailed t-test (B). Mean $\pm$  SEM. NS, not significant. (E) A schematic overview of the AOM-DSS induced CAC model. (F) Bioluminescent images obtained at week 6 after AOM-DSS treatment following intraperitoneal injection of L-012 solution. (G) Representative longitudinal images of tumor burden in the colon specimens from CAC induced mice. Tumors indicated by white arrows. (H) RT-qPCR analyses of intratumoral cytokine mRNAs from colon tumors and matched normal colons of CAC-induced WT mice and mIgG2c-G400R mice. (I) Representative images of H&E-stained colon cross-sections from CAC induced WT mice (n=5) and mIgG2c-G400R mice (n=5). Scale bar, 1000  $\mu$ m. One of three representative experiments is shown. Statistical significance was determined using two-way ANOVA (A, B) or unpaired two-tailed t-test (D, F, H). Mean $\pm$  SEM. NS, not significant.

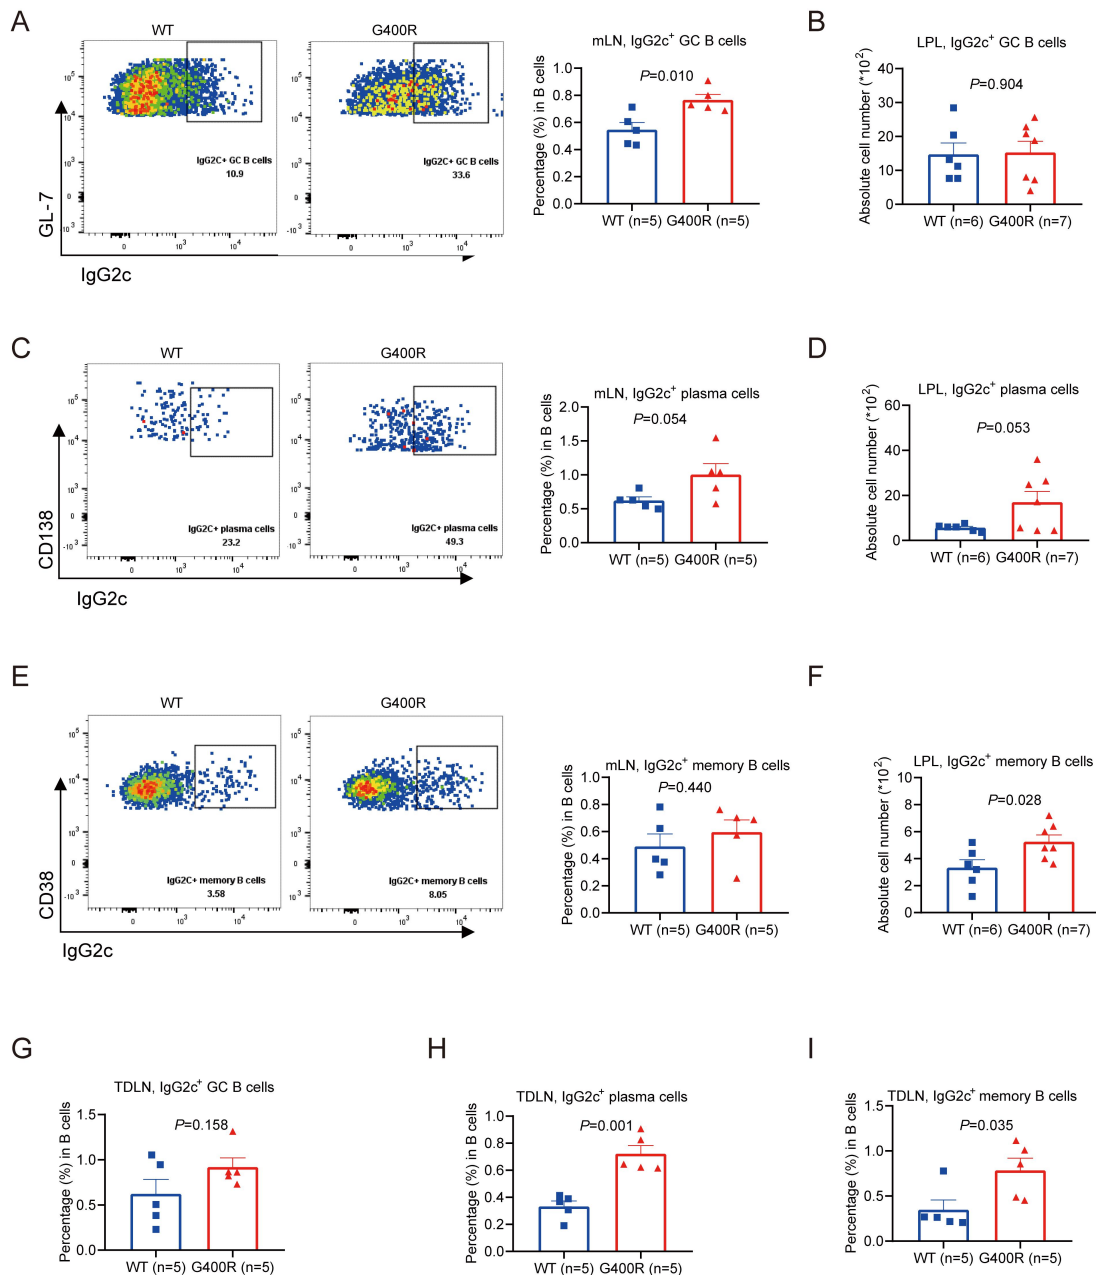

**Supplemental Figure 6. mIgG2c-G400R promotes B cell differentiation upon tumor cell inoculation.**

(A--F) The relative percentages of IgG2c<sup>+</sup> GC B cells in (A) mLNs and (B) lamina propria (LP), plasma cells in (C) mLNs and (D) LP, memory B cells in (E) mLNs and (F) LP from CAC-inducing mIgG2c-G400R mice in comparison to WT mice. (G-I) The relative percentages of IgG2c<sup>+</sup> GC B cells (G), plasma cells (H) and memory B cells (I) in TDLNs from MC38 cell-inoculating mice. One of three representative experiments is shown. Statistical significance was determined using an unpaired two-tailed t-test.



Mean± SEM.

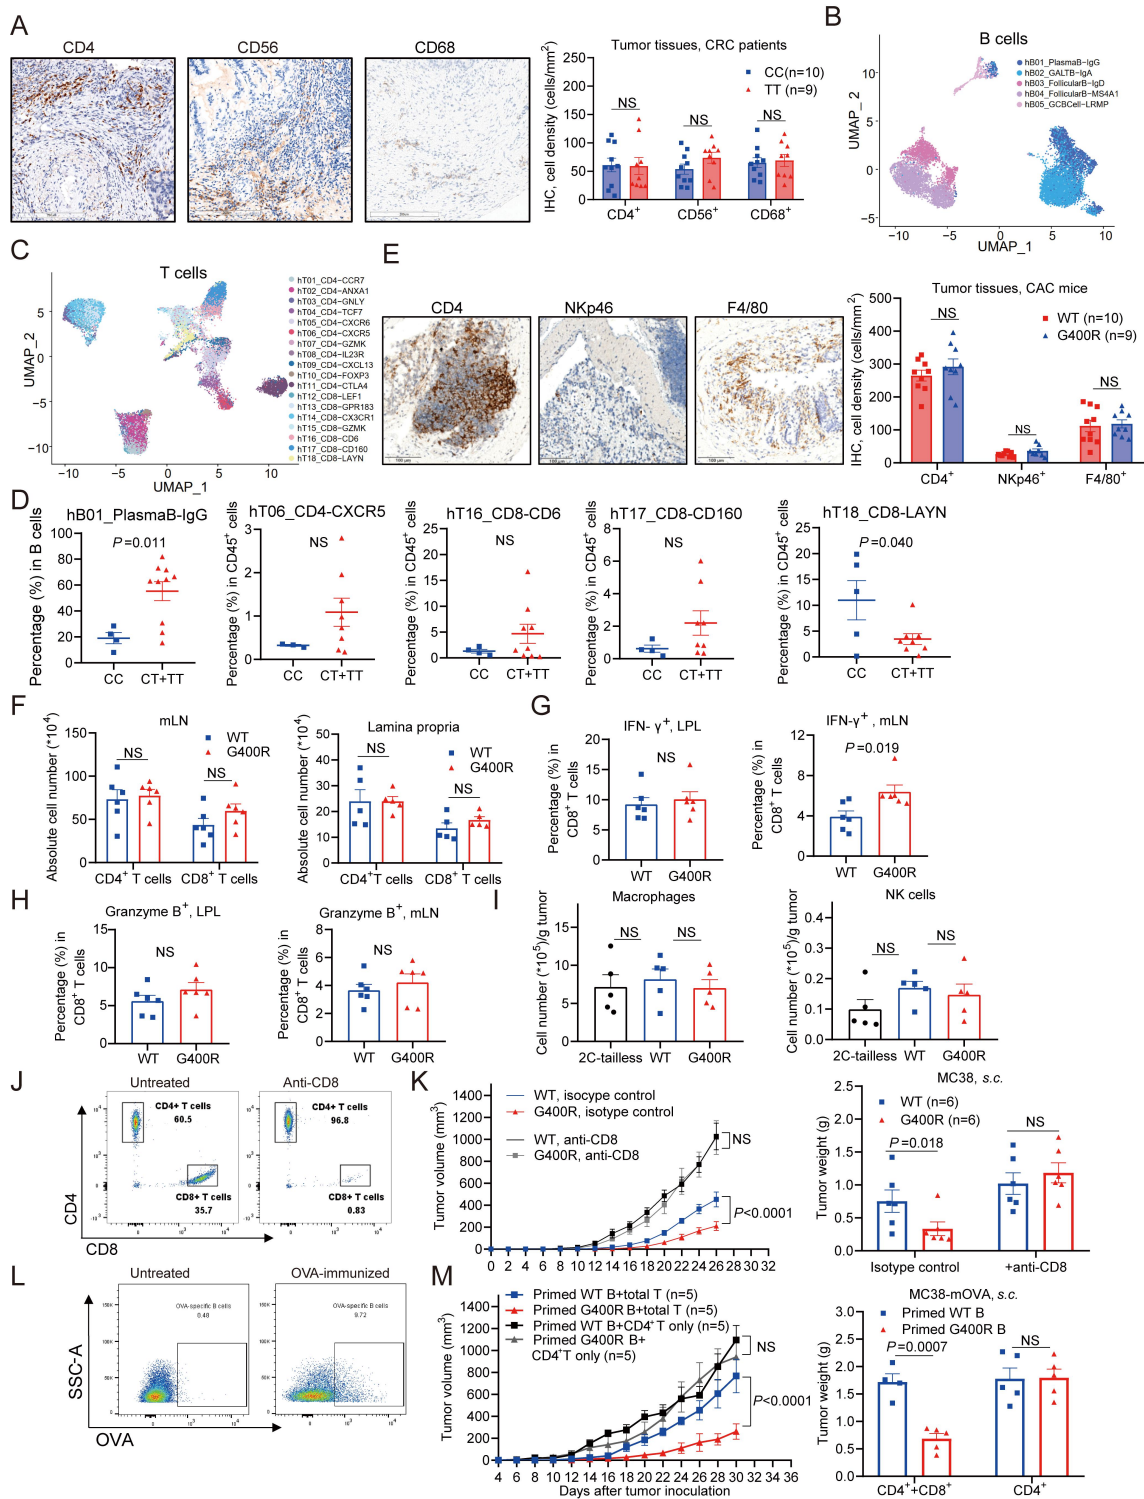

**Supplemental Figure 7. Altered immune microenvironment in mIgG2c-G400R mice.**

(A) Representative images of colon specimens from CRC patients immunohistochemically stained with CD4, CD56 and CD68. Scale bar, 200  $\mu$ m. The

numbers of CD4<sup>+</sup> T cells, NK cells, macrophages per mm<sup>2</sup> are shown. **(B-C)** Representative UMAP plot showing the clusters of **(B)** B cells and **(C)** T cells from 18 CRC patients analyzed by scRNA-seq. **(D)** The proportions of tumor-infiltrating IgG<sup>+</sup> plasma cells within total B cells, CXCR5<sup>+</sup> T follicular helper cells, CD6<sup>+</sup> tumor-resident memory T cells, CD160<sup>+</sup> intraepithelial CD8<sup>+</sup> T cells and LAYN<sup>+</sup> exhausted T cells within total CD45<sup>+</sup> cells from the scRNA-seq results. **(E)** Representative IHC staining images of the colon tumor specimens from CAC-induced mice. Scale bar, 100 μm. The numbers of CD4<sup>+</sup> T cells, NK cells, macrophages per mm<sup>2</sup> are shown. **(F)** Quantification of CD4<sup>+</sup> T cells and CD8<sup>+</sup> T cells in the mLN and lamina propria of CAC mice, basing on the results of flow cytometry. **(G-H)** Flow cytometric analyses of CD4<sup>+</sup> T cells, CD8<sup>+</sup> T cells, IFN-γ secreting and GZMB secreting CD8<sup>+</sup> T cells. **(I)** Quantification of tumor-infiltrating macrophages and NK cells of MC38-mOVA cell inoculated mice, basing on the results of flow cytometry. **(J)** The number of CD8<sup>+</sup> T cells in the blood after anti-CD8a antibody dominated CD8<sup>+</sup> T cell depletion was detected via flow cytometry and representative flow plots are shown. **(K)** WT mice and mIgG2c-G400R mice in the isotype control and anti-CD8 groups were subcutaneously injected with MC38 cells. Tumor growth curves and tumor weight are shown. **(L)** *Rag1*<sup>-/-</sup> mice were transferred with either CD4<sup>+</sup> and CD8<sup>+</sup> T cells or CD4<sup>+</sup> T cells alone with OVA-specific B cells, followed by MC38-mOVA cell inoculation. **(M)** Tumor growth curves and tumor weight are shown. Statistical significance was determined using an unpaired two-tailed t-test and two-way ANOVA (K, M). Mean ± SEM. NS, not significant.

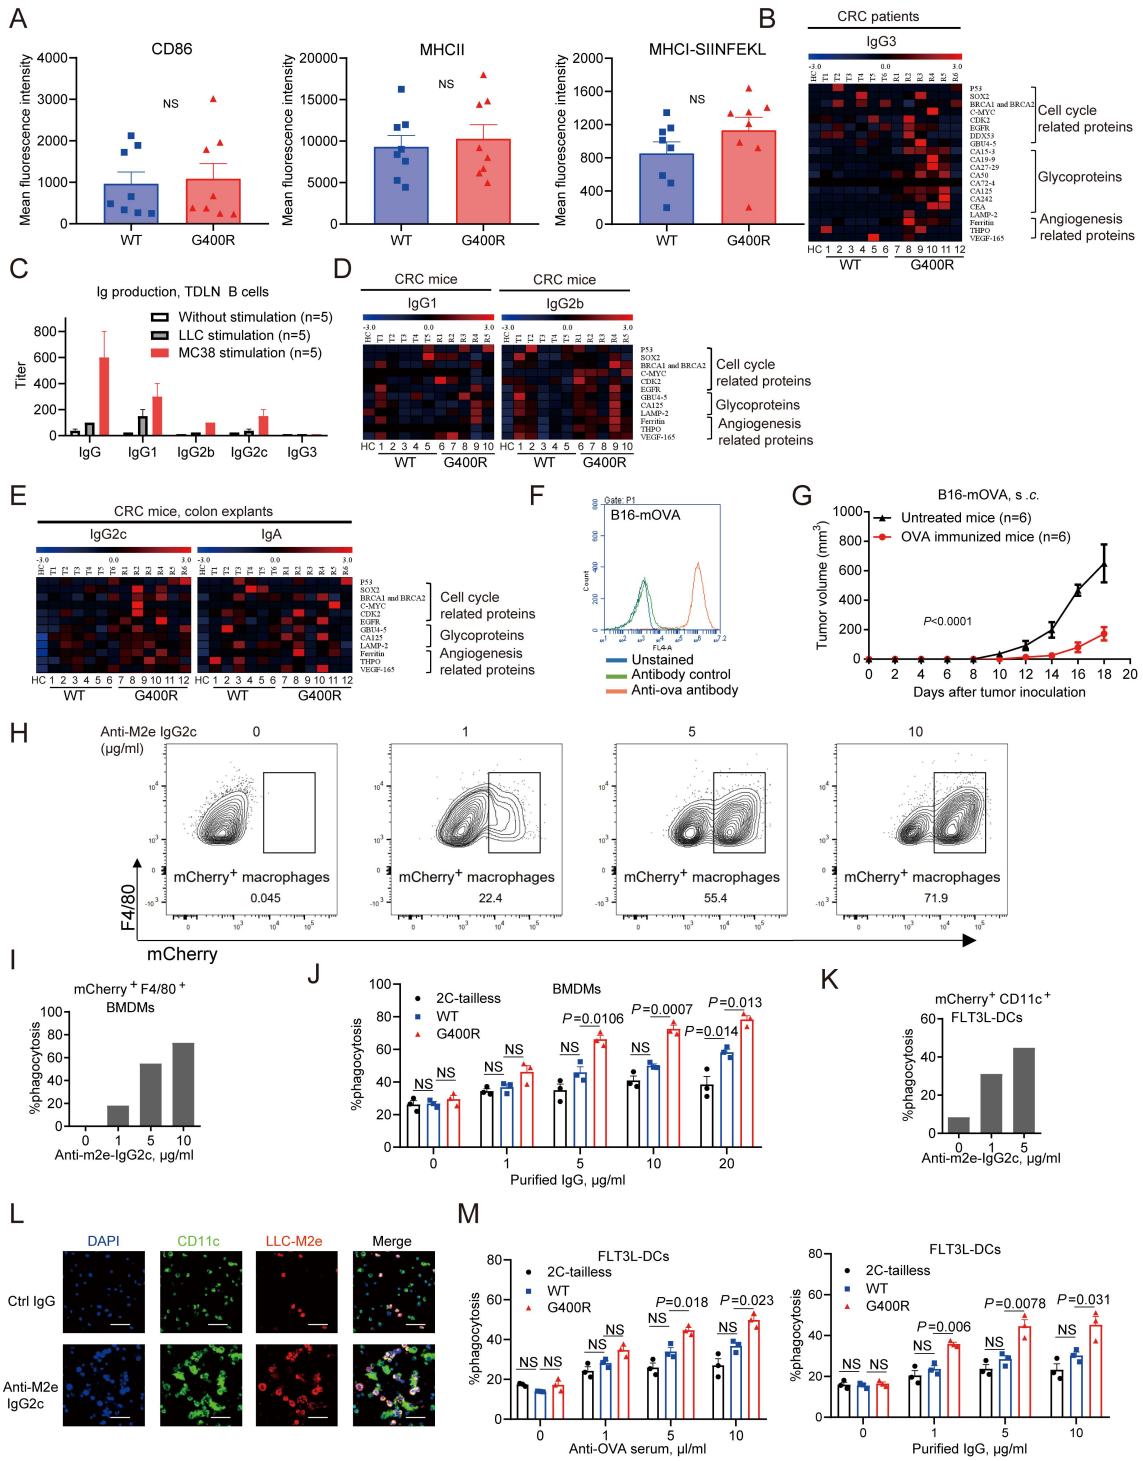

**Supplemental Figure 8. Enhanced tumor-specific antibody production and ADCP efficiency mediated by phagocytes, occurring with both hIgG1-G396R and mIgG2c-G400R variant.**

(A) Expression of CD86, MHC II, MHC I-SIINFEKL by tumor-infiltrating IgG2c<sup>+</sup> B cells at day 3 post MC38-mOVA tumor cell inoculation, detected by flow cytometry. (B)

Heatmap showing the levels of IgG3 in the plasma of healthy donor (n=1), WT CRC patients (n=6) and hIgG1-G396R homozygous CRC patients (n=6). (C) Secretion of IgG subclasses by activated TDLN B cells in stimulation with cell medium, irradiated LLC cells or MC38 cells. (D) Heatmap showing the levels of IgG1 and IgG2b in the sera from untreated mouse (n=1), CAC-induced WT mice (n=5) and mIgG2c-G400R mice (n=5). (E) Heatmap showing the levels of IgA and IgG2c in the colon explants from WT CAC mice (n=6), mIgG2c-G400R CAC mice (n=6) and cell medium. (F) OVA expression in the surface of B16-mOVA cells detected by flow cytometry. (G) The tumor growth curves of B16-mOVA cells in untreated mice and OVA-immunized mice. (H) Representative flow cytometry plots to compare the ADCP activities of BMDMs with the presence of anti-M2e IgG2c antibody. (I) Fractions of F4/80<sup>+</sup> mCherry<sup>+</sup> cells after co-culture with anti-M2e IgG2c antibody-coated LLC-M2e cells, determined by flow cytometry. (J) Comparison of BMDMs mediated ADCP activities using purified IgG, prepared from the anti-OVA serum of OVA-immunized mice. (K) Comparison of FLT3L-DCs mediated ADCP activities using anti-M2e IgG2c and control IgG, detected by flow cytometry. (L) Representative confocal fluorescence images showing the process of phagocytosis mediated by FLT3L-DCs. Nuclei marked by DAPI (blue), DCs were stained with CD11c-FITC (green) and tumor cells labeled by mCherry (red). Scale bar, 50  $\mu$ m. (M) Comparison of FLT3L-DCs mediated ADCP activities using anti-OVA serum and purified IgG, detected by flow cytometry. One of three representative experiments is shown. Statistical significance was determined using two-way ANOVA (G) and one-way ANOVA. (J, M). Mean $\pm$  SEM. NS, not significant.

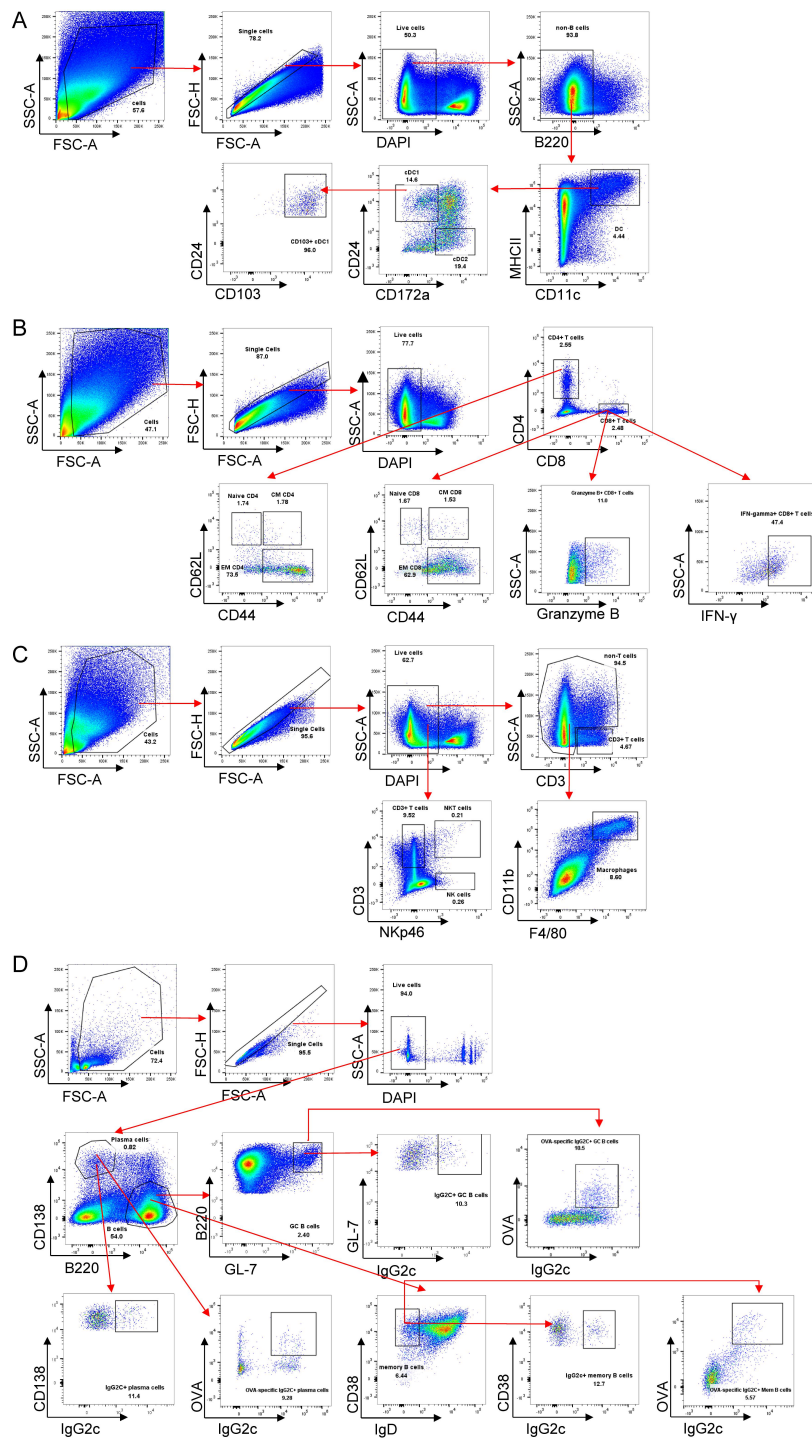

**Supplemental Figure 9. Flow cytometry gating strategy for DCs (A), T cells (B), NK cells, macrophages (C) and B cell subsets (D)**

**Supplementary tables.**

| <b>Characteristics</b>          | <b>Number</b> | <b>%</b> |
|---------------------------------|---------------|----------|
| <b>Gender</b>                   |               |          |
| Female                          | 427           | 42.4     |
| Male                            | 579           | 57.6     |
| <b>Age at diagnosis (years)</b> |               |          |
| Median                          | 67            |          |
| Range                           | 58-76         |          |
| <b>BMI</b>                      |               |          |
| Median                          | 23.5          |          |
| Range                           | 21.2-26       |          |
| <b>Tumor size (cm)</b>          |               |          |
| Median                          | 4             |          |
| Range                           | 4-6           |          |
| <b>Tumor location</b>           |               |          |
| Ascending colon                 | 241           | 24       |
| Transverse colon                | 50            | 5        |
| Descending colon                | 46            | 4.6      |
| Sigmoid colon                   | 247           | 24.6     |
| Rectum                          | 422           | 41.9     |
| <b>Gross morphology</b>         |               |          |
| Ulcer type                      | 720           | 71.6     |
| Eminence type                   | 272           | 27       |
| Infiltration type               | 14            | 1.4      |
| <b>Histological type</b>        |               |          |
| Adenocarcinoma                  | 910           | 90.5     |
| Other*                          | 96            | 9.5      |
| <b>Tumor differentiation</b>    |               |          |
| Well and Moderate               | 783           | 77.8     |
| Poor                            | 223           | 22.2     |
| <b>Lymphovascular invasion</b>  |               |          |
| Positive                        | 728           | 72.4     |
| Negative                        | 276           | 27.4     |
| <b>T (tumor stage)</b>          |               |          |
| T1                              | 24            | 2.4      |
| T2                              | 121           | 12       |
| T3                              | 368           | 36.6     |
| T4                              | 493           | 49       |
| <b>N (regional lymph node)</b>  |               |          |
| N0                              | 538           | 53.5     |
| N1                              | 261           | 25.9     |
| N2                              | 207           | 20.6     |
| <b>M (metastasis)</b>           |               |          |
| M0                              | 909           | 90.4     |

| <b>Characteristics</b>                | <b>Number</b> | <b>%</b> |
|---------------------------------------|---------------|----------|
| M+                                    | 97            | 9.6      |
| <b>Clinical stage</b>                 |               |          |
| I                                     | 120           | 11.9     |
| II                                    | 401           | 39.9     |
| III                                   | 384           | 38.2     |
| IV                                    | 101           | 10       |
| <b>Postoperative adjuvant therapy</b> |               |          |
| Yes                                   | 373           | 37.1     |
| No                                    | 620           | 61.6     |
| Unknown                               | 13            | 1.3      |
| <b>CEA (ng/ml)</b>                    |               |          |
| Median                                | 4.2           |          |
| Range (min to max)                    | 0.12-1000     |          |
| <b>AFP (ng/ml)</b>                    |               |          |
| Median                                | 2.4           |          |
| Range (min to max)                    | 0.18-24.57    |          |
| <b>CA199 (U/ml)</b>                   |               |          |
| Median                                | 12.5          |          |
| Range (min to max)                    | 0.5-1000      |          |
| <b>CA125 (U/ml)</b>                   |               |          |
| Median                                | 9.6           |          |
| Range (min to max)                    | 0-882.6       |          |

\* Mucinous adenocarcinoma, neuroendocrine carcinoma, signet ring cell carcinoma

**Supplemental Table 1. Baseline clinical characteristics of CRC Patients (n=1006).**

TNM staging was performed according to AJCC 's (8<sup>th</sup> edition) instructions.



| SNP rs117518546  |                  | HCs (%)      | CRC patients (%) | OR    | 95% CI      | P      |
|------------------|------------------|--------------|------------------|-------|-------------|--------|
| <b>Allelic</b>   | <b>C</b>         | 813 (69.73)  | 1450 (72.07)     | 0.893 | 0.762-1.046 | 0.086  |
|                  | <b>T</b>         | 353 (30.27)  | 562 (27.93)      |       |             |        |
| <b>Dominant</b>  | <b>CC</b>        | 300 (51.46)  | 537 (53.38)      | 0.926 | 0.755-1.136 | 0.246  |
|                  | <b>CT+TT</b>     | 283 (48.54)  | 469 (46.62)      |       |             |        |
| <b>Genotypic</b> | <b>Recessive</b> | <b>CC+CT</b> | 513 (87.99)      | 0.747 | 0.538-1.037 | 0.049* |
|                  |                  | <b>TT</b>    | 70 (12.01)       |       |             |        |
| <b>Additive</b>  | <b>CC</b>        | 300 (51.46)  | 537 (53.38)      | 0.902 | 0.775-1.049 | 0.180  |
|                  | <b>CT</b>        | 213 (36.53)  | 376 (37.38)      |       |             |        |
|                  | <b>TT</b>        | 70 (12.01)   | 93 (9.24)        |       |             |        |

|                        | HCs          | CRC Patients |
|------------------------|--------------|--------------|
| <b>Sample size</b>     | 583          | 1006         |
| <b>Male</b>            | 335 (57.46%) | 579 (57.55%) |
| <b>Female</b>          | 248 (42.54%) | 427 (42.45%) |
| <b>Age (Mean± SEM)</b> | 35.18±18.57  | 66.26±12.41  |

\*P value < 0.05

OR, odds ratio; CI, confidence interval

**Supplemental Table 2. The hIgG1-G396R variant allele frequency in HCs and CRC patients**

| rs117518546, OS         | Univariable COX regression analysis |             |        | Multivariable COX regression analysis |             |        |
|-------------------------|-------------------------------------|-------------|--------|---------------------------------------|-------------|--------|
|                         | Model                               | HR          | 95% CI | P value                               | HR          | 95% CI |
| Additive (CT vs CC)     | 0.914                               | 0.723-1.156 | 0.454  | 0.86                                  | 0.669-1.107 | 0.242  |
| Additive (TT vs CC)     | 0.505                               | 0.303-0.844 | 0.009* | 0.467                                 | 0.27-0.81   | 0.007* |
| Recessive (TT vs CC+CT) | 0.525                               | 0.317-0.868 | 0.012* | 0.497                                 | 0.289-0.853 | 0.011* |
| Dominant (CT+TT vs CC)  | 0.834                               | 0.665-1.045 | 0.115  | 0.78                                  | 0.612-0.994 | 0.045* |

| rs117518546, PFS        | Univariable COX regression analysis |             |        | Multivariable COX regression analysis |             |        |
|-------------------------|-------------------------------------|-------------|--------|---------------------------------------|-------------|--------|
|                         | Model                               | HR          | 95% CI | P value                               | HR          | 95% CI |
| Additive (CT vs CC)     | 0.889                               | 0.707-1.118 | 0.315  | 0.874                                 | 0.684-1.116 | 0.28   |
| Additive (TT vs CC)     | 0.569                               | 0.355-0.913 | 0.02*  | 0.591                                 | 0.358-0.977 | 0.04*  |
| Recessive (TT vs CC+CT) | 0.598                               | 0.376-0.951 | 0.03*  | 0.625                                 | 0.382-1.023 | 0.062  |
| Dominant (CT+TT vs CC)  | 0.827                               | 0.664-1.03  | 0.09   | 0.821                                 | 0.649-1.037 | 0.098  |

\*P value < 0.05

**Supplemental Table 3. Univariable and multivariable COX regression analyses to investigate the effects of hlgG1-G396R variants on OS or PFS.**



|                                      | All cases       | CC              | CT              | TT              | P    | CC              | TT              | P     |
|--------------------------------------|-----------------|-----------------|-----------------|-----------------|------|-----------------|-----------------|-------|
| Well and Moderate                    | 783             | 414(52.9)       | 289(36.9)       | 80(10.2)        | 0.14 | 414(83.8)       | 80(16.2)        | 0.053 |
| Poor                                 | 223             | 123(55.2)       | 87(39.0)        | 13(5.8)         |      | 123(90.4)       | 13(9.6)         |       |
| <b>Lymphovascular invasion, n(%)</b> |                 |                 |                 |                 |      |                 |                 |       |
| Positive                             | 728             | 390(53.6)       | 270(37.1)       | 68(9.3)         | 0.96 | 390(85.2)       | 68(14.8)        | 0.943 |
| Negative                             | 276             | 146(52.9)       | 105(38)         | 25(9.1)         |      | 146(85.4)       | 25(14.6)        |       |
| <b>T, n(%)</b>                       |                 |                 |                 |                 |      |                 |                 |       |
| T1+T2                                | 145             | 76(52.4)        | 53(36.6)        | 16(11)          | 0.72 | 76(82.6)        | 16(17.4)        | 0.442 |
| T3+T4                                | 861             | 461(53.5)       | 323(37.5)       | 77(8.9)         |      | 461(85.7)       | 77(14.3)        |       |
| <b>N, n(%)</b>                       |                 |                 |                 |                 |      |                 |                 |       |
| N0                                   | 538             | 278(51.7)       | 208(38.7)       | 52(9.7)         | 0.51 | 278(84.2)       | 52(15.8)        | 0.46  |
| N+                                   | 468             | 259(55.3)       | 168(35.9)       | 41(8.8)         |      | 259(86.3)       | 41(13.7)        |       |
| <b>M, n(%)</b>                       |                 |                 |                 |                 |      |                 |                 |       |
| M0                                   | 909             | 478(52.6)       | 343(37.7)       | 88(9.7)         | 0.18 | 478(84.5)       | 88(15.5)        | 0.098 |
| M+                                   | 97              | 59(60.8)        | 33(34)          | 5(5.2)          |      | 59(92.2)        | 5(7.8)          |       |
| <b>Clinical stage, n(%)</b>          |                 |                 |                 |                 |      |                 |                 |       |
| I+II                                 | 521             | 266(51.1)       | 203(39)         | 52(10)          | 0.29 | 266(83.6)       | 52(16.4)        | 0.256 |
| III+IV                               | 485             | 271(55.9)       | 173(35.7)       | 41(8.5)         |      | 271(86.9)       | 41(13.1)        |       |
| <b>CEA(ng/ml), median(range)</b>     | 4.2(0.12-1000)  | 4.4(0.2-1000)   | 3.8(0.2-1000)   | 4.4(0.12-196.1) | 0.44 | 4.4(0.2-1000)   | 4.4(0.12-196.1) | 0.2   |
| <b>AFP(ng/ml), median(range)</b>     | 2.4(0.18-24.57) | 2.4(0.18-24.57) | 2.3(0.24-23.12) | 2.6(0.21-10.67) | 0.62 | 2.4(0.18-24.57) | 2.6(0.21-10.67) | 0.685 |
| <b>CA199(U/ml), median(range)</b>    | 12.5(0.5-1000)  | 12.5(0.6-1000)  | 12.3(0.5-1000)  | 13.4(0.6-1000)  | 0.61 | 12.5(0.6-1000)  | 13.4(0.6-1000)  | 0.381 |
| <b>CA125(U/ml), median(range)</b>    | 9.6(0-882.6)    | 9.9(0-326.1)    | 9.3(0-882.6)    | 9.3(0-209)      | 0.68 | 9.9(0-326.1)    | 9.3(0-209)      | 0.514 |

\* P value < 0.05; \*\* Mucinous adenocarcinoma, neuroendocrine carcinoma, signet ring cell carcinoma

0 **Supplemental Table 4. Characteristics of CRC patients in different genotypes (n=1006).**

---

| <b>CRC patients, number</b> | <b>rs117518546 genotype</b> |
|-----------------------------|-----------------------------|
| P0413                       | CC                          |
| P1228                       | CC                          |
| P0411                       | CC                          |
| P0825                       | CC                          |
| P0202                       | CC                          |
| P0720                       | CC                          |
| P0123                       | CT                          |
| P1212                       | CT                          |
| P0309                       | CT                          |
| P0104                       | CT                          |
| P0305                       | CT                          |
| P0323                       | CT                          |
| P0408                       | CT                          |
| P0410                       | CT                          |
| P0613                       | CT                          |
| P0728                       | CT                          |
| P1026                       | CT                          |
| P1025                       | TT                          |

---

- 1 **Supplemental Table 5. Genotypes of 18 CRC patients involved in scRNA-seq analyses.**
- 2 The rs117518546 genotypes of 18 CRC patients using in the scRNA-seq assays are shown, which
- 3 were verified via either Taqman-probe-based genotyping or bulk WES.

| Species       | Target gene    | Sequences (5'-3')       |                           |
|---------------|----------------|-------------------------|---------------------------|
| Human         | <i>GAPDH</i>   | Forward                 | ACCTCAACTACATGGCTGAGAAC   |
|               |                | Reverse                 | CATGGTGGTGAAGACGCCAG      |
|               | <i>IGHG1</i>   | Forward                 | AATGGGCAGCCGGAGAACAAC     |
|               |                | Reverse                 | TGCTCTTGTCCACGGTGAGCTT    |
|               | <i>IGHG2</i>   | Forward                 | AATGGGCAGCCGGAGAACAAC     |
|               |                | Reverse                 | TGCTCTTGTCCACGGTGAGCTT    |
|               | <i>IGHG3</i>   | Forward                 | TAAGCCCACCCCAAAGGCCAAA    |
|               |                | Reverse                 | ACCGTGGGCATGTGTGAGTTGT    |
|               | <i>IGHG4</i>   | Forward                 | AATGGGCAGCCGGAGAACAAC     |
|               |                | Reverse                 | TTGTCCACGGTTAGCCTGCTGT    |
|               | <i>IGHA</i>    | Forward                 | CGCTGGCCTTCACACAGAA       |
|               |                | Reverse                 | CGCCATGACAACAGACACA       |
|               | <i>CXCL12</i>  | Forward                 | ACTGGGTTTGTGATTGCCTCTGAA  |
|               |                | Reverse                 | GGAACCTGAACCCCTGCTGTG     |
| <i>CXCL13</i> | Forward        | GAGGCAGATGGAAGTTGAGC    |                           |
|               | Reverse        | CTGGGGATCTTCGAATGCTA    |                           |
| <i>CCL19</i>  | Forward        | CCAGCCCCAACTCTGAGTG     |                           |
|               | Reverse        | ATCCTTGATGAGAAGGTAGTGGA |                           |
| <i>CCL21</i>  | Forward        | CGCAGCTACCGGAAGCAG      |                           |
|               | Reverse        | CTGCCTGAGAGCGCTTGC      |                           |
| Mouse         | <i>GAPDH</i>   | Forward                 | AGTATGACTCCACTCACGGCAA    |
|               |                | Reverse                 | TCTCGCTCCTGGAAGATGGT      |
|               | <i>TGFB</i>    | Forward                 | AGAGAAGAAGTCTGTGTGC       |
|               |                | Reverse                 | GGGTTGTGTTGGTTGTAGAG      |
|               | <i>IL1B</i>    | Forward                 | CAACCAACAAGTGATATTCTCCATG |
|               |                | Reverse                 | GATCCACACTCTCCAGCTGCA     |
|               | <i>IL6</i>     | Forward                 | ACCAGAGGAAATTTTCAATAGGC   |
|               |                | Reverse                 | TGATGCACTTGCAGAAAACA      |
|               | <i>IL23p19</i> | Forward                 | CCAGCGGGACATATGAATCT      |
|               |                | Reverse                 | AGGCTCCCCTTTGAAGATGT      |
|               | <i>CXCL13</i>  | Forward                 | AACTCCACCTCCAGGCAGAATG    |
|               |                | Reverse                 | TGTGTAATGGGCTTCCAGAATACC  |
|               | <i>CCL21</i>   | Forward                 | GCAAAGAGGGAGCTAGAAAACAGA  |
|               |                | Reverse                 | TGGACGGAGGCCAGCAT         |
| <i>CXCR5</i>  | Forward        | GACTCCTTACCACAGTGCACCTT |                           |
|               | Reverse        | GGAAACGGGAGGTGAACCA     |                           |

4 Supplemental Table 6. Primers for RT-qPCR analyses.
